# Supplementary material for: Comprehensive analysis of a prognostic immune-related gene signature in esophageal carcinoma predicts disease prognosis and treatment response
Source: Research Square preprint supplement (doi:10.21203/rs.3.rs-2697253/v1), 2023-03-29
Supplement: Supplementary file 1 [file 6e3c6573bf7e9ebc45861bed.docx]

| Drug | Senstivity (IC50) p value |  | Drug | Senstivity (IC50) p value |
| --- | --- | --- | --- | --- |
| A.443654 | 0.65 |  | Paclitaxel | 0.26 |
| A.770041 | 0.73 |  | Parthenolide | 0.95 |
| ABT.263 | 0.018 |  | Pazopanib | 0.39 |
| ABT.888 | 0.0018 |  | PHA.665752 | 0.027 |
| AICAR | 0.36 |  | PLX4720 | 0.51 |
| AMG.706 | 0.036 |  | QS11 | 0.34 |
| AP.24534 | 0.11 |  | Rapamycin | 0.0046 |
| BIBW2992 | 0.89 |  | RDEA119 | 0.02 |
| Bleomycin | 0.51 |  | RO.3306 | 0.15 |
| Bosutinib | 0.22 |  | Roscovitine | 0.019 |
| Bryostatin.1 | 0.013 |  | S.Trityl.L.cysteine | 0.25 |
| cisplatin | 0.57 |  | Salubrinal | 0.0051 |
| CMK | 1 |  | SB.216763 | 0.47 |
| Cyclopamine | 0.051 |  | SB590885 | 0.34 |
| Cytarabine | 0.72 |  | Shikonin | 0.54 |
| Dasatinib | 0.25 |  | Sorafenib | 0.27 |
| DMOG | 0.012 |  | Sunitinib | 0.00061 |
| Docetaxel | 0.96 |  | Temsirolimus | 0.0044 |
| Doxorubicin | 0.51 |  | Thapsigargin | 0.58 |
| Elesclomol | 0.32 |  | Tipifarnib | 0.4 |
| Embelin | 0.22 |  | TW.37 | 0.14 |
| Epothilone.B | 0.23 |  | VIII | 0.36 |
| Erlotinib | 0.2 |  | Vinblastine | 0.035 |
| Etoposide | 0.24 |  | Vinorelbine | 0.39 |
| FH535 | 0.023 |  | Vorinostat | 0.047 |
| Gefitinib | 0.085 |  | VX.680 | 0.46 |
| Gemcitabine | 0.63 |  | VX.702 | 0.018 |
| Imatinib | 0.31 |  | WH.4.023 | 0.61 |
| Lapatinib | 0.88 |  | WO2009093972 | 0.11 |
| Lenalidomide | 9.8e−05 |  | WZ.1.84 | 0.25 |
| Metformin | 0.005 |  | X17.AAG | 0.0097 |
| Methotrexate | 0.027 |  | X681640 | 0.31 |
| Midostaurin | 0.53 |  | XMD8.85 | 0.023 |
| Mitomycin.C | 0.2 |  | Z.LLNle.CHO | 0.53 |
| Nilotinib | 0.00086 |  | ZM.447439 | 0.031 |

Table S3 Comparison of IC50 values of 70 drugs in high-risk and low-risk patients
