# Supplementary material for: Comprehensive analysis of a prognostic immune-related gene signature in esophageal carcinoma predicts disease prognosis and treatment response
Source: Research Square preprint supplement (doi:10.21203/rs.3.rs-2697253/v1), 2023-03-29
Supplement: Supplementary file 2 [file df0ceeae0596be587270e5ec.docx]

**Table** **l:Clinicolpatholgical** **characteristies** **of** **the** **patient** **cohorts**

| **Clinical parameters** | **Variable** | **TCGA**  **(n =158)** | **Clinical**  **(n =38)** |
| --- | --- | --- | --- |

| Age(years) | <=55 | 50 | 9 |
| --- | --- | --- | --- |
| >55 | 108 | 29 |
| Gender | female | 23 | 9 |
| male | 135 | 29 |
| Disease type | Adenocarcinoma | 78 | 0 |
| Squamous cell carcinoma | 80 | 38 |
| Histological grade | G1 | 16 | 6 |
| G2 | 65 | 26 |
| G3 | 44 | 6 |
| Stage | unknow | 34 | 0 |
| stage I | 16 | 2 |
| stageⅡ | 68 | 26 |
| stageⅢ | 55 | 10 |
| stageIV | 15 | 0 |
| T | unknow | 4 | 0 |
| T1 | 25 | 2 |
| T2 | 41 | 13 |
| T3 | 85 | 23 |
| T4 | 5 | 0 |
| N | unknow | 2 | 0 |
| N0 | 66 | 23 |
| N1 | 85 | 15 |
| M | unknow | 7 | 0 |
| M0 | 126 | 12 |
| M1 | 15 | 0 |
| Survival status | unknow | 17 | 26 |
| Aliave | 96 | 19 |
| Dead | 62 | 19 |

n:Number of Patients
