# Supplementary figures and images for: Comprehensive analysis of a prognostic immune-related gene signature in esophageal carcinoma predicts disease prognosis and treatment response
Source: Research Square preprint supplement (doi:10.21203/rs.3.rs-2697253/v1), 2023-03-29

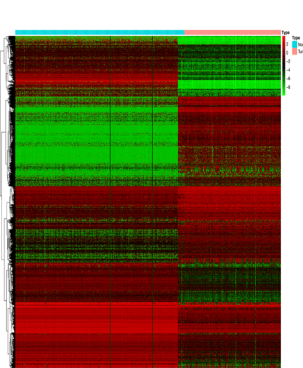

A

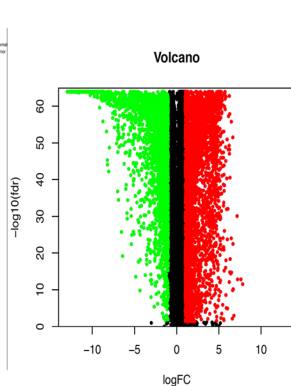

B

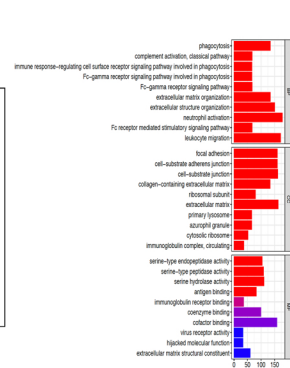

C

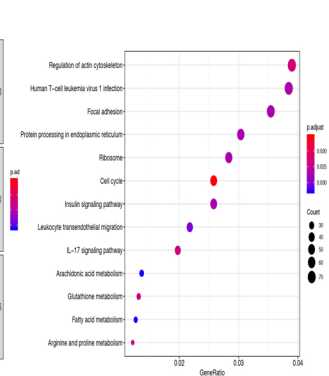

D

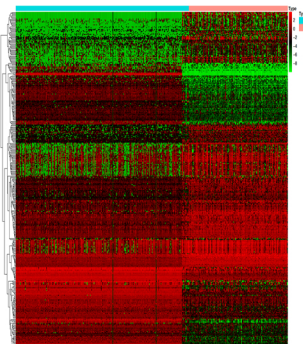

E

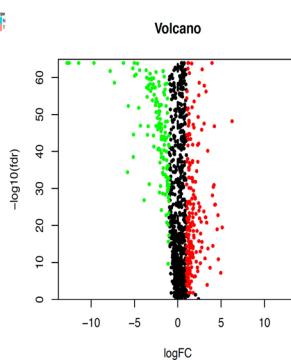

F

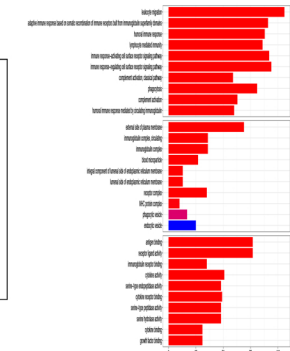

G

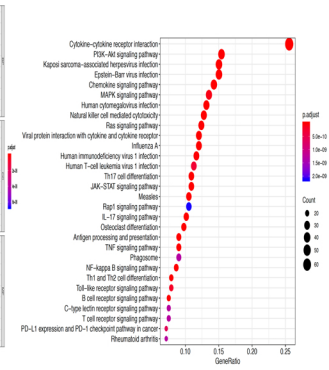

H

Supplement: Supplementary file 1 [file fe45300581f89b0b8bbbba65.pdf]
